# Supplementary material for: Interactions of L-3,5,3'-Triiodothyronine, Allopregnanolone, and Ivermectin with the GABAA Receptor: Evidence for Overlapping Intersubunit Binding Modes
Source: PubMed Central journal article supplement (PMC4589331; doi:10.1371/journal.pone.0139072), 2015-09-30

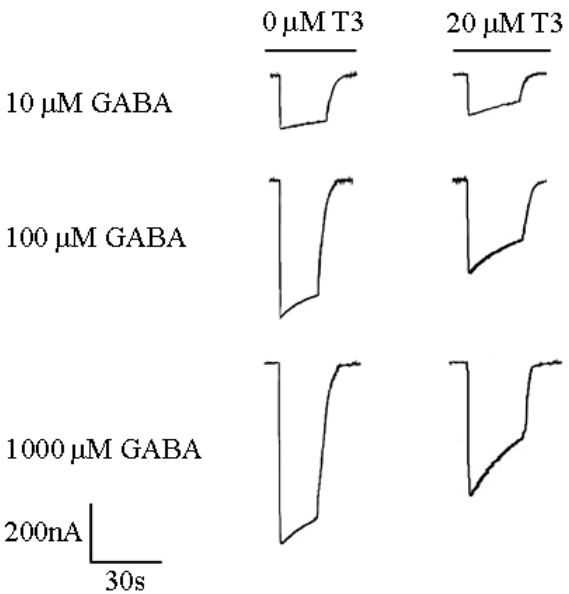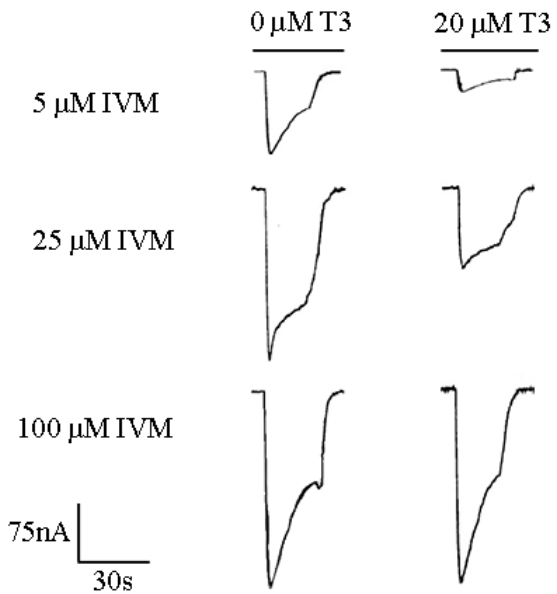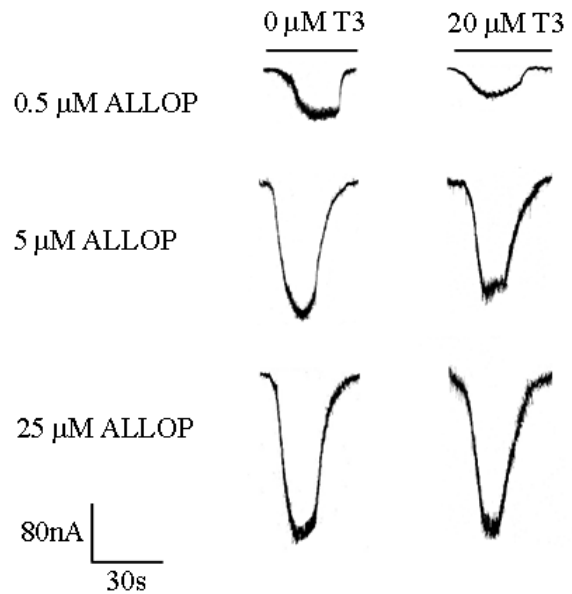

Supplement: pone.0139072.s002.pdf [file pone.0139072.s002.pdf]
