# Supplementary material for: Interactions of L-3,5,3'-Triiodothyronine, Allopregnanolone, and Ivermectin with the GABAA Receptor: Evidence for Overlapping Intersubunit Binding Modes
Source: PubMed Central journal article supplement (PMC4589331; doi:10.1371/journal.pone.0139072), 2015-09-30
Supplement: pone.0139072.s009.pdf [file pone.0139072.s009.pdf]

| Ligand | $\beta$ - $\alpha$ | $\beta$ - $\alpha$ | $\gamma$ - $\beta$ | $\alpha$ - $\gamma$ | $\alpha$ - $\beta$ |
|--------|--------------------|--------------------|--------------------|---------------------|--------------------|
| T3     | 0.4                | 0.1                | -                  | <u>0</u>            | -                  |
| IVM    | 1.0                | 1.1                | <u>0</u>           | 0.7                 | 0.4                |
| ALLOP  | 1.1                | 0.2                | 0.2                | <u>0</u>            | 0.4                |
