# Supplementary material for: Interactions of L-3,5,3'-Triiodothyronine, Allopregnanolone, and Ivermectin with the GABAA Receptor: Evidence for Overlapping Intersubunit Binding Modes
Source: PubMed Central journal article supplement (PMC4589331; doi:10.1371/journal.pone.0139072), 2015-09-30
Supplement: pone.0139072.s010.pdf [file pone.0139072.s010.pdf]

| Component                            | $\beta$ - $\alpha$ | $\beta$ - $\alpha$ | $\gamma$ - $\beta$ | $\alpha$ - $\gamma$ | $\alpha$ - $\beta$ |
|--------------------------------------|--------------------|--------------------|--------------------|---------------------|--------------------|
| Bond                                 | 0.1                | 0.4                | <u>0.0</u>         | 0.6                 | 0.5                |
| Angle                                | 0.3                | 0.4                | 0.4                | 1.2                 | <u>0.0</u>         |
| Dihedral                             | 1.0                | 1.9                | <u>0.0</u>         | 1.2                 | 1.1                |
| Improper                             | <u>0.0</u>         | <u>0.0</u>         | 0.1                | <u>0.0</u>          | 0.1                |
| Total<br>Conformational <sup>1</sup> | 0.9                | 2.2                | <u>0.0</u>         | 2.6                 | 1.4                |
| Electrostatic                        | 1.0                | <u>0.0</u>         | 3.0                | 2.9                 | 4.4                |
| van Der Waals                        | 0.7                | 0.5                | 1.6                | 0.0                 | 0.5                |
| Total Non-bonded <sup>1</sup>        | 1.2                | <u>0.0</u>         | 4.2                | 2.4                 | 4.4                |
| <b>Total<sup>1</sup></b>             | <b><u>0.0</u></b>  | <b>0.1</b>         | <b>2.0</b>         | <b>2.9</b>          | <b>3.6</b>         |

<sup>1</sup> The values in each row are offset so that the lowest energy interface (underlined) in the row has a value of 0, for consistency with Figures 6C and S4; consequently, the values in a given "Total" row may differ from the sum of the previous rows by a value that is constant across the interfaces.
