# Supplementary material for: Interactions of L-3,5,3'-Triiodothyronine, Allopregnanolone, and Ivermectin with the GABAA Receptor: Evidence for Overlapping Intersubunit Binding Modes
Source: PubMed Central journal article supplement (PMC4589331; doi:10.1371/journal.pone.0139072), 2015-09-30
Supplement: pone.0139072.s011.pdf [file pone.0139072.s011.pdf]

|                                      | $\beta$ - $\alpha$                                     | $\beta$ - $\alpha$        | $\gamma$ - $\beta$        | $\alpha$ - $\gamma$       | $\alpha$ - $\beta$ |
|--------------------------------------|--------------------------------------------------------|---------------------------|---------------------------|---------------------------|--------------------|
| Avg Number /<br>Frame <sup>1</sup>   | 0.6                                                    | 1.1                       | 0.8                       | 0.9                       | 0                  |
| Most Frequent <sup>2</sup>           | $\alpha$ M1 I228<br>(40%)/<br>$\beta$ M2 S265<br>(40%) | $\beta$ M3 D282<br>(60%)  | $\gamma$ M2 R284<br>(90%) | $\alpha$ M3 Q287<br>(70%) | -                  |
| Second Most<br>Frequent <sup>2</sup> | $\beta$ M2 T262<br>(10%)                               | $\alpha$ M1 Q229<br>(20%) | $\gamma$ M2 S280<br>(5%)  | $\gamma$ M1 I238<br>(30%) | -                  |

<sup>1</sup> Number of hydrogen bonds per frame formed between T3 and protein residues lining the cavity, averaged over the second 100 ns of the simulation; values greater than one indicate multiple hydrogen bonds formed in most frames.

<sup>2</sup> Number in parentheses indicates the percentage of the average number/frame that was contributed by this interaction.
